# Supplementary material
Source: Springer Nature journal article supplement (https://www.springermedizin.de/resource/supplementary/13063_2014_2322_MOESM8_ESM.pdf/9621892)

# CONSENT OVERVIEW

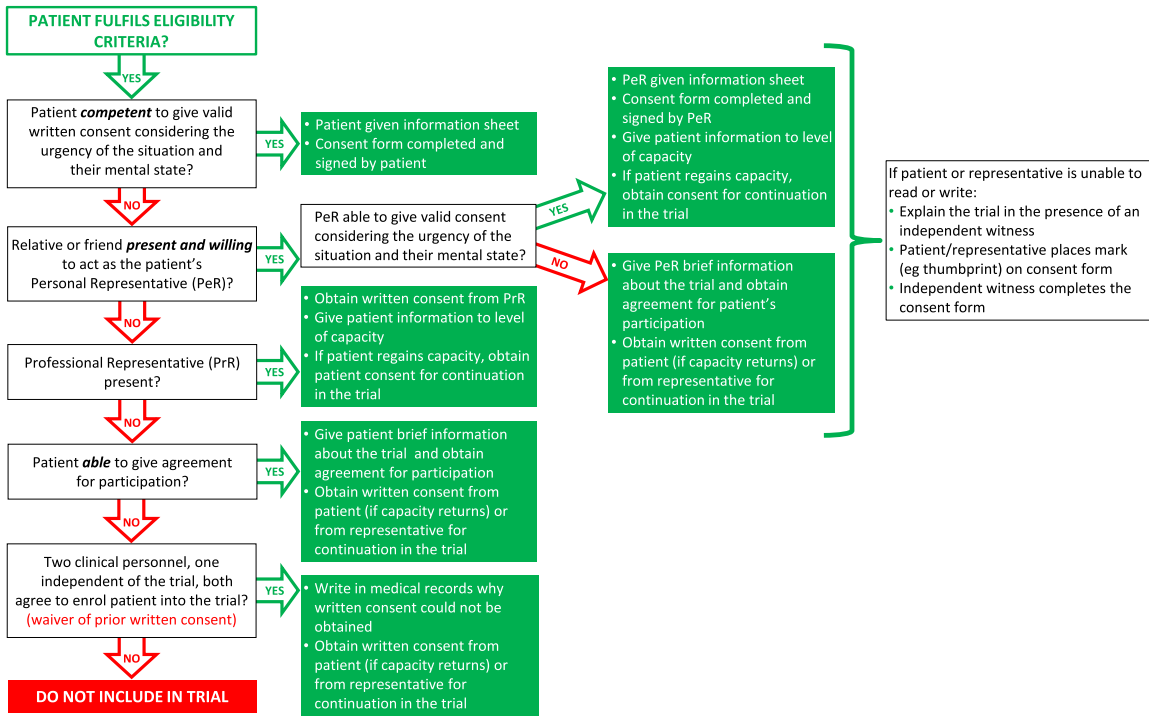

Supplement: MOESM8 [file 9621892]
